# Supplementary material
Source: publisher figshare collection journal article supplement (https://frontiersin.figshare.com/ndownloader/files/24783935)
Supplement: Supplementary file [file 24783935]

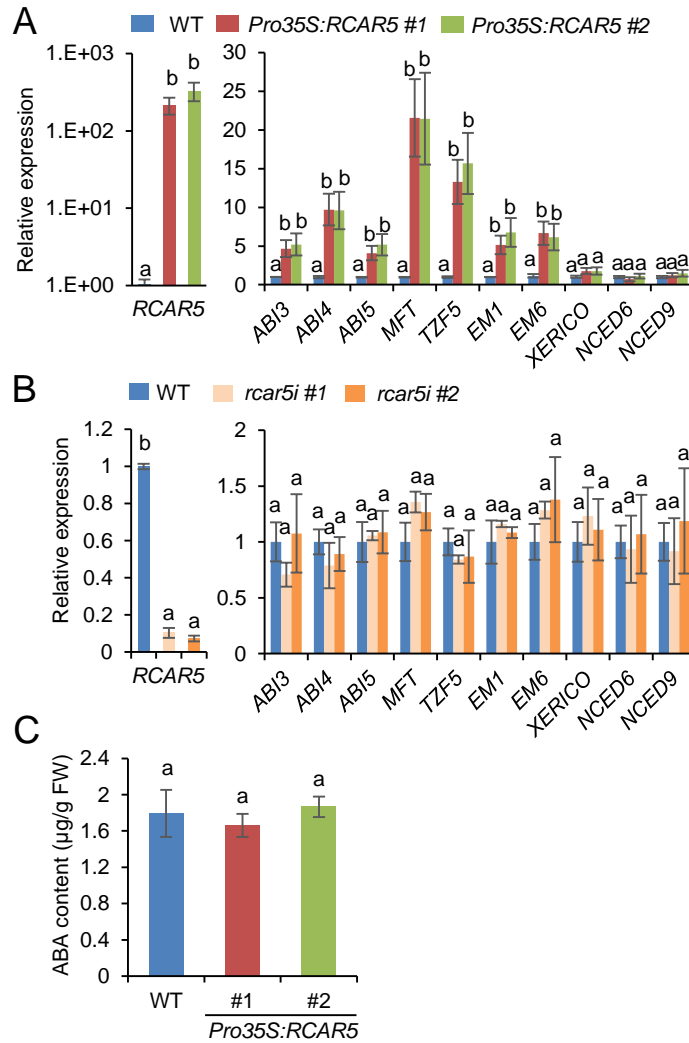

**FIGURE S3** ABA-responsive genes and ABA quantification in Arabidopsis dry seeds. (A, B) Expression patterns of ABA-responsive genes in dry seeds of *Pro35S:RCAR5* (a) and *RCAR5-RNAi* (b) mutants. *PP2A* was used as an internal control for normalization. The expression level of each gene in WT was set to 1.0. (C) Quantification of ABA contents in dry seeds of *Pro35S:RCAR5* mutants and Col-0 plants. ABA content was measured in freshly harvested dry seeds of each plant lines by using the Phytodetek-ABA kit (Agdia Inc., Elkhart, IN, USA). FW, Fresh weight. All data represent mean  $\pm$  SD of three independent experiments. Different letters indicate a significant difference between WT and transgenic plants (ANOVA;  $P < 0.05$ ).
